# Supplementary material for: 2[Mn(acacen)]+ + 1[Fe(CN)5NO]− polynuclear heterobimetallic coordination compounds of different dimensionality in the solid state
Source: Royal Society of Chemistry journal article supplement (doi:10.1039/c2dt11983h), 2012-01-01
Supplement: c2dt11983h.pdf [file c2dt11983h.pdf]

**2[Mn(acacen)]<sup>+</sup> + 1[Fe(CN)<sub>5</sub>NO]<sup>-</sup> polynuclear heterobimetallic  
 coordination compounds of different dimensionality in the solid state**

by Eugenia V. Peresyphkina and Kira E. Vostrikova

**Crystallographic section**

The following compounds are structurally characterized:

- (2) [ {Mn(acacen)H<sub>2</sub>O} <sub>2</sub> Fe(CN)<sub>5</sub>NO ] · C<sub>2</sub>H<sub>5</sub>OH  
 (3) [ {Mn(acacen)H<sub>2</sub>O} <sub>4</sub> (Fe(CN)<sub>5</sub>NO) ] [ Fe(CN)<sub>5</sub>NO ] · 4CH<sub>3</sub>CN  
 (4) [ {Mn(acacen)} <sub>2</sub> (C<sub>3</sub>H<sub>7</sub>OH) { Fe(CN)<sub>5</sub>NO } ] <sub>n</sub>  
 (5) [ {Mn(acacen)} <sub>2</sub> Fe(CN)<sub>5</sub>NO ] <sub>n</sub>  
 acacen = C<sub>12</sub>H<sub>18</sub>N<sub>2</sub>O<sub>2</sub>

**Table 1S.** Crystal data, data collection and structure refinement parameters for **2 – 5**.

| Compound                                                      | <b>2</b>                                                                         | <b>3</b>                                                                                        | <b>4</b>                                                                         | <b>5</b>                                                                         |
|---------------------------------------------------------------|----------------------------------------------------------------------------------|-------------------------------------------------------------------------------------------------|----------------------------------------------------------------------------------|----------------------------------------------------------------------------------|
| Empirical formula                                             | C <sub>31</sub> H <sub>46</sub> FeMn <sub>2</sub> N <sub>10</sub> O <sub>8</sub> | C <sub>66</sub> H <sub>92</sub> Fe <sub>2</sub> Mn <sub>4</sub> N <sub>24</sub> O <sub>14</sub> | C <sub>32</sub> H <sub>44</sub> FeMn <sub>2</sub> N <sub>10</sub> O <sub>6</sub> | C <sub>29</sub> H <sub>36</sub> FeMn <sub>2</sub> N <sub>10</sub> O <sub>5</sub> |
| Molecular weight                                              | 852.51                                                                           | 1777.10                                                                                         | 830.50                                                                           | 770.41                                                                           |
| Crystal system                                                | monoclinic                                                                       | tetragonal                                                                                      | monoclinic                                                                       | tetragonal                                                                       |
| Space group                                                   | <i>C2/c</i>                                                                      | <i>P4/n</i>                                                                                     | <i>P2<sub>1</sub></i>                                                            | <i>P4<sub>3</sub></i>                                                            |
| a, Å                                                          | 19.0620(5)                                                                       | 20.6997(4)                                                                                      | 9.8861(6)                                                                        | 10.8355(4)                                                                       |
| b, Å                                                          | 14.5264(4)                                                                       | 20.6997(4)                                                                                      | 12.6888(6)                                                                       | 10.8355(4)                                                                       |
| c, Å                                                          | 14.3781(3)                                                                       | 9.9205(5)                                                                                       | 16.0244(9)                                                                       | 29.115(2)                                                                        |
| β, °                                                          | 92.3120(10)                                                                      | 90                                                                                              | 107.5510(10)                                                                     | 90                                                                               |
| V, Å <sup>3</sup>                                             | 3978.09(17)                                                                      | 4250.7(2)                                                                                       | 1916.57(18)                                                                      | 3418.4(3)                                                                        |
| Z                                                             | 4                                                                                | 2                                                                                               | 2                                                                                | 4                                                                                |
| D <sub>calc</sub> , g/cm <sup>3</sup>                         | 1.423                                                                            | 1.388                                                                                           | 1.439                                                                            | 1.497                                                                            |
| μ, mm <sup>-1</sup>                                           | 1.043                                                                            | 0.979                                                                                           | 1.077                                                                            | 1.199                                                                            |
| 2θ <sub>max</sub> , °                                         | 63.08                                                                            | 59.32                                                                                           | 52.78                                                                            | 55.00                                                                            |
| Temperature, K                                                | 100.0(2)                                                                         | 120.0(2)                                                                                        | 150.0(2)                                                                         | 301(2)                                                                           |
| Crystal size, mm                                              | 0.49×0.41×0.13                                                                   | 0.36×0.28×0.08                                                                                  | 0.145×0.080×0.075                                                                | 0.14×0.14×0.12                                                                   |
| Range <i>h, k, l</i>                                          | -27 ≤ <i>h</i> ≤ 27,<br>-21 ≤ <i>k</i> ≤ 20,<br>-13 ≤ <i>l</i> ≤ 19              | -27 ≤ <i>h</i> ≤ 21,<br>-19 ≤ <i>k</i> ≤ 27,<br>-13 ≤ <i>l</i> ≤ 13                             | -12 ≤ <i>h</i> ≤ 12,<br>-15 ≤ <i>k</i> ≤ 8,<br>-20 ≤ <i>l</i> ≤ 20               | -11 ≤ <i>h</i> ≤ 14,<br>-14 ≤ <i>k</i> ≤ 11,<br>-37 ≤ <i>l</i> ≤ 37              |
| Reflns measured                                               | 18426                                                                            | 28719                                                                                           | 12744                                                                            | 26240                                                                            |
| Unique reflns                                                 | 5529                                                                             | 5309                                                                                            | 5791                                                                             | 7849                                                                             |
| R <sub>int</sub>                                              | 0.0310                                                                           | 0.0196                                                                                          | 0.0313                                                                           | 0.0396                                                                           |
| Observed ( <i>I</i> > 2σ( <i>I</i> ))                         | 5037                                                                             | 4574                                                                                            | 5111                                                                             | 6158                                                                             |
| Refined parameters                                            | 251                                                                              | 267                                                                                             | 473                                                                              | 435                                                                              |
| Restraints                                                    | 0                                                                                | 0                                                                                               | 1                                                                                | 1                                                                                |
| R <sub>1</sub> , wR <sub>2</sub> ( <i>I</i> > 2σ( <i>I</i> )) | R <sub>1</sub> = 0.0696,<br>wR <sub>2</sub> = 0.1314                             | R <sub>1</sub> = 0.0290,<br>wR <sub>2</sub> = 0.0690                                            | R <sub>1</sub> = 0.0290,<br>wR <sub>2</sub> = 0.0598                             | R <sub>1</sub> = 0.0360,<br>wR <sub>2</sub> = 0.0752                             |
| R <sub>1</sub> , wR <sub>2</sub> (all data)                   | R <sub>1</sub> = 0.0770,<br>wR <sub>2</sub> = 0.1344                             | R <sub>1</sub> = 0.0371,<br>wR <sub>2</sub> = 0.0731                                            | R <sub>1</sub> = 0.0381,<br>wR <sub>2</sub> = 0.0625                             | R <sub>1</sub> = 0.0831,<br>wR <sub>2</sub> = 0.0834                             |
| Goodness-of-fit on F <sup>2</sup>                             | 1.255                                                                            | 1.080                                                                                           | 1.010                                                                            | 0.954                                                                            |
| Largest diff. peak, hole (e Å <sup>-3</sup> )                 | 0.888/ -1.609                                                                    | 0.846/ -0.250                                                                                   | 0.408/ -0.327                                                                    | 0.340/ -0.221                                                                    |

**The disorder in 2 and 3.** The nitroprusside anion in **2** and **3** (counter anion only) is disordered over two positions so that iron occupies two close positions switching between disordered CN and NO groups. As nitroprusside anion has similar dimensions despite nitrosyl and cyanogroup being in the axial position, crystal packing is not influenced by the nitroprusside flipping. Since the coordinated NO group is shorter than CN and the terminal atoms of nitroprusside CN groups are fixed within the crystal environment, the iron atom is disordered over two very close positions (~0.5 Å) while light atoms of NO and CN groups coincide (in **3**, Fig 1aS) or almost coincide (in **2**, Fig 1bS). Due to the fact that iron ion usually occupies special positions, the effect is averaged by symmetry. Therefore, elongation in the axial direction a.d.p. ellipsoid of iron atom may point to such disorder. The position of disordered Fe was resolved in both structures followed by decreasing residuals R<sub>1</sub> and wR<sub>2</sub>. Our attempts to split disordered positions for CN/NO groups succeeded in **2**, and failed in **3**. In **2** they are refined with anisotropic a.d.p. parameters, while in **3** with both coordinates and a.d.p. parameters set equal.

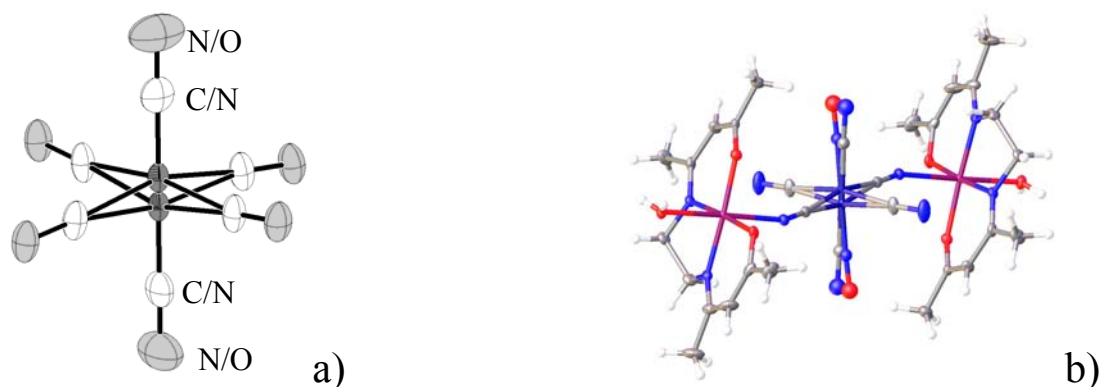

**Fig. 1S** The disorder model for nitroprusside anions found in **3** (a) and in **2** (b) with mixed and split positions of CN and NO ligands.

**Compound 2.**  $[\{\text{Mn}(\text{acacen})\text{H}_2\text{O}\}_2\text{Fe}(\text{CN})_5\text{NO}] \cdot \text{C}_2\text{H}_5\text{OH}$

**Table 2S.** Selected geometric parameters ( $\text{\AA}$ ,  $^\circ$ ) in **2**.

|                                         |             |                                          |             |
|-----------------------------------------|-------------|------------------------------------------|-------------|
| Mn1—O1                                  | 1.8970 (10) | C3—C4                                    | 1.423 (2)   |
| Mn1—O2                                  | 1.9082 (10) | C4—C5                                    | 1.510 (2)   |
| Mn1—N2                                  | 1.9697 (12) | C6—C7                                    | 1.512 (2)   |
| Mn1—N1                                  | 1.9710 (13) | C8—C9                                    | 1.512 (2)   |
| Mn1—O3                                  | 2.2471 (11) | C9—C10                                   | 1.431 (2)   |
| Mn1—N13                                 | 2.3325 (13) | C10—C11                                  | 1.371 (2)   |
| Fe1—N4                                  | 1.658 (3)   | C11—C12                                  | 1.502 (2)   |
| Fe1—C13 <sup>i</sup>                    | 1.9337 (14) | Fe2—Fe2 <sup>iv</sup>                    | 0.5418 (12) |
| Fe1—C13 <sup>ii</sup>                   | 1.9337 (14) | Fe2—C21                                  | 1.532 (3)   |
| Fe1—C13                                 | 1.9337 (14) | Fe2—C22                                  | 1.9438 (16) |
| Fe1—C13 <sup>iii</sup>                  | 1.9337 (14) | Fe2—C22 <sup>v</sup>                     | 1.9438 (16) |
| Fe1—C15                                 | 1.945 (3)   | Fe2—C22 <sup>iv</sup>                    | 1.9640 (16) |
| N13—C13                                 | 1.1467 (19) | Fe2—C22 <sup>vi</sup>                    | 1.9640 (16) |
| O4—N4                                   | 1.146 (4)   | Fe2—C21 <sup>iv</sup>                    | 2.073 (3)   |
| N15—C15                                 | 1.147 (4)   | Fe2—N21N <sup>iv</sup>                   | 2.073 (3)   |
| O1—C2                                   | 1.2982 (19) | C21—N21                                  | 1.154 (4)   |
| O2—C11                                  | 1.3036 (18) | C21—Fe2 <sup>iv</sup>                    | 2.073 (3)   |
| N1—C4                                   | 1.308 (2)   | N22—C22                                  | 1.147 (2)   |
| N1—C6                                   | 1.4774 (19) | C22—Fe2 <sup>iv</sup>                    | 1.9640 (16) |
| N2—C9                                   | 1.300 (2)   | N1S—C1S                                  | 1.142 (3)   |
| N2—C7                                   | 1.4732 (19) | C1S—C2S                                  | 1.454 (4)   |
| C1—C2                                   | 1.504 (2)   | O3—H31                                   | 0.84 (3)    |
| C2—C3                                   | 1.372 (2)   | O3—H32                                   | 0.79 (2)    |
| O1—Mn1—O2                               | 90.58 (4)   | C2—C3—C4                                 | 126.03 (15) |
| O1—Mn1—N2                               | 176.26 (5)  | N1—C4—C3                                 | 122.69 (14) |
| O2—Mn1—N2                               | 92.63 (5)   | N1—C4—C5                                 | 120.17 (14) |
| O1—Mn1—N1                               | 92.60 (5)   | C3—C4—C5                                 | 117.13 (15) |
| O2—Mn1—N1                               | 175.13 (5)  | N1—C6—C7                                 | 108.94 (12) |
| N2—Mn1—N1                               | 84.33 (5)   | N2—C7—C6                                 | 108.58 (12) |
| O1—Mn1—O3                               | 90.39 (4)   | N2—C9—C10                                | 122.23 (13) |
| O2—Mn1—O3                               | 91.31 (4)   | N2—C9—C8                                 | 121.14 (14) |
| N2—Mn1—O3                               | 87.62 (5)   | C10—C9—C8                                | 116.62 (14) |
| N1—Mn1—O3                               | 92.36 (5)   | C11—C10—C9                               | 125.74 (15) |
| O1—Mn1—N13                              | 93.49 (4)   | O2—C11—C10                               | 125.25 (14) |
| O2—Mn1—N13                              | 87.44 (4)   | O2—C11—C12                               | 114.16 (13) |
| N2—Mn1—N13                              | 88.57 (5)   | C10—C11—C12                              | 120.56 (14) |
| N1—Mn1—N13                              | 88.68 (5)   | Fe2 <sup>iv</sup> —Fe2—C21               | 180.000 (3) |
| O3—Mn1—N13                              | 175.93 (5)  | Fe2 <sup>iv</sup> —Fe2—C22               | 84.16 (6)   |
| N4—Fe1—C13 <sup>i</sup>                 | 96.11 (5)   | C21—Fe2—C22                              | 95.84 (6)   |
| N4—Fe1—C13 <sup>ii</sup>                | 96.11 (5)   | Fe2 <sup>iv</sup> —Fe2—C22 <sup>v</sup>  | 84.16 (6)   |
| C13 <sup>i</sup> —Fe1—C13 <sup>ii</sup> | 89.352 (10) | C21—Fe2—C22 <sup>v</sup>                 | 95.84 (6)   |
| N4—Fe1—C13                              | 96.11 (5)   | C22—Fe2—C22 <sup>v</sup>                 | 168.32 (12) |
| C13 <sup>i</sup> —Fe1—C13               | 89.352 (10) | Fe2 <sup>iv</sup> —Fe2—C22 <sup>iv</sup> | 79.91 (6)   |
| C13 <sup>ii</sup> —Fe1—C13              | 167.79 (9)  | C21—Fe2—C22 <sup>iv</sup>                | 100.09 (6)  |
| N4—Fe1—C13 <sup>iii</sup>               | 96.11 (5)   | C22—Fe2—C22 <sup>iv</sup>                | 88.979 (7)  |

|                                           |             |                                           |             |
|-------------------------------------------|-------------|-------------------------------------------|-------------|
| C13 <sup>i</sup> —Fe1—C13 <sup>iii</sup>  | 167.79 (9)  | C22 <sup>v</sup> —Fe2—C22 <sup>iv</sup>   | 88.979 (7)  |
| C13 <sup>ii</sup> —Fe1—C13 <sup>iii</sup> | 89.352 (10) | Fe2 <sup>iv</sup> —Fe2—C22 <sup>vi</sup>  | 79.91 (6)   |
| C13—Fe1—C13 <sup>iii</sup>                | 89.352 (11) | C21—Fe2—C22 <sup>vi</sup>                 | 100.09 (6)  |
| N4—Fe1—C15                                | 180.000 (2) | C22—Fe2—C22 <sup>vi</sup>                 | 88.979 (7)  |
| C13 <sup>i</sup> —Fe1—C15                 | 83.89 (5)   | C22 <sup>v</sup> —Fe2—C22 <sup>vi</sup>   | 88.979 (7)  |
| C13 <sup>ii</sup> —Fe1—C15                | 83.89 (5)   | C22 <sup>iv</sup> —Fe2—C22 <sup>vi</sup>  | 159.83 (12) |
| C13—Fe1—C15                               | 83.89 (5)   | C21—Fe2—C21 <sup>iv</sup>                 | 180.000 (1) |
| C13 <sup>iii</sup> —Fe1—C15               | 83.89 (5)   | C22—Fe2—C21 <sup>iv</sup>                 | 84.16 (6)   |
| C13—N13—Mn1                               | 142.86 (11) | C22 <sup>v</sup> —Fe2—C21 <sup>iv</sup>   | 84.16 (6)   |
| N13—C13—Fe1                               | 175.96 (14) | C22 <sup>iv</sup> —Fe2—C21 <sup>iv</sup>  | 79.91 (6)   |
| O4—N4—Fe1                                 | 180.000 (2) | C22 <sup>vi</sup> —Fe2—C21 <sup>iv</sup>  | 79.91 (6)   |
| N15—C15—Fe1                               | 180.000 (1) | C21—Fe2—N21N <sup>iv</sup>                | 180.000 (1) |
| C2—O1—Mn1                                 | 127.76 (10) | C22—Fe2—N21N <sup>iv</sup>                | 84.16 (6)   |
| C11—O2—Mn1                                | 125.95 (9)  | C22 <sup>v</sup> —Fe2—N21N <sup>iv</sup>  | 84.16 (6)   |
| C4—N1—C6                                  | 120.78 (13) | C22 <sup>iv</sup> —Fe2—N21N <sup>iv</sup> | 79.91 (6)   |
| C4—N1—Mn1                                 | 125.91 (10) | C22 <sup>vi</sup> —Fe2—N21N <sup>iv</sup> | 79.91 (6)   |
| C6—N1—Mn1                                 | 112.57 (10) | N21—C21—Fe2                               | 180.000 (1) |
| C9—N2—C7                                  | 122.08 (12) | N21—C21—Fe2 <sup>iv</sup>                 | 180.000 (1) |
| C9—N2—Mn1                                 | 126.38 (10) | N22—C22—Fe2                               | 167.85 (18) |
| C7—N2—Mn1                                 | 111.25 (10) | N22—C22—Fe2 <sup>iv</sup>                 | 176.18 (18) |
| O1—C2—C3                                  | 124.68 (14) | Fe2—C22—Fe2 <sup>iv</sup>                 | 15.93 (4)   |
| O1—C2—C1                                  | 114.46 (14) | N1S—C1S—C2S                               | 178.6 (3)   |
| C3—C2—C1                                  | 120.86 (15) | H32—O3—H31                                | 107 (2)     |

Symmetry code(s): (i)  $y, -x+3/2, z$ ; (ii)  $-x+3/2, -y+3/2, z$ ; (iii)  $-y+3/2, x, z$ ; (iv)  $y+1/2, -x+1, -z+2$ ; (v)  $-x+3/2, -y+1/2, z$ ; (vi)  $-y+1, x-1/2, -z+2$ .

#### Hydrogen bonds (Å, °) in 2.

| Hydrogen bond      | D-H     | H...A   | D...A    | <(DHA) | Symmetry operations     |
|--------------------|---------|---------|----------|--------|-------------------------|
| O(3)-H(31)...N(41) | 0.79(4) | 1.99(4) | 2.775(4) | 172(4) | $-x+3/2, y+1/2, -z+1/2$ |
| O(3)-H(32)...O(1)  | 0.75(4) | 2.06(4) | 2.808(3) | 174(4) | $-x+3/2, -y+1/2, -z$    |

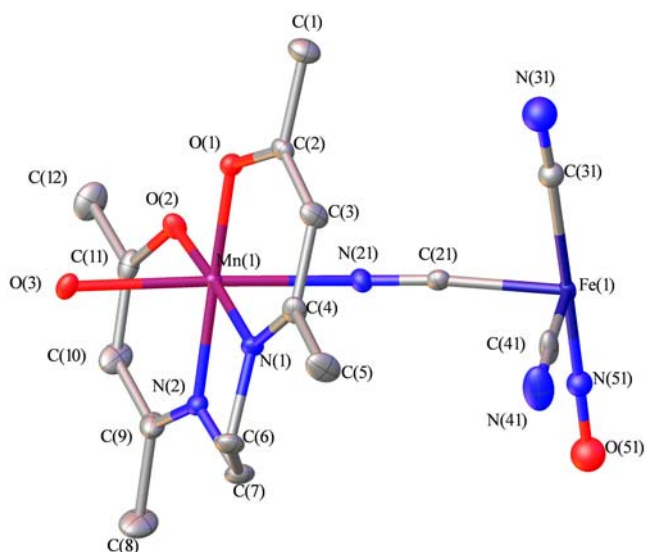

**Fig. 2aS** ORTEP plot (ellipsoids of 50% probability) with numerating scheme for  $[\text{Mn}(\text{acacen})\text{H}_2\text{O}]_2[\text{Fe}(\text{CN})_5\text{NO}]$  in **2**.

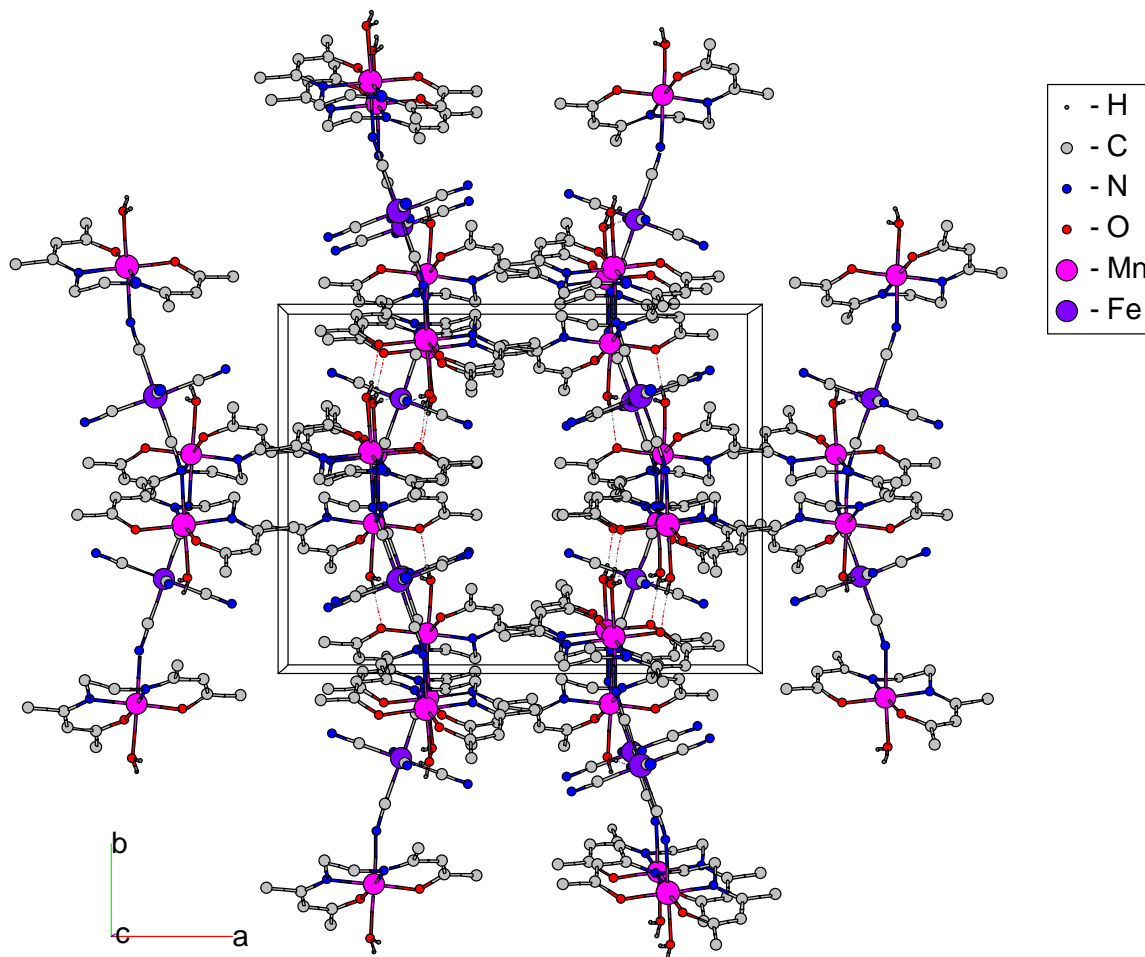

**Fig. 2bS** Molecular crystal packing (b) in  $[\text{Mn}(\text{acacen})\text{H}_2\text{O}]_2\text{Fe}(\text{CN})_5\text{NO}$  in **2**. Hydrogen atoms for *acacen* ligands and EtOH solvent molecules are omitted for clarity. Hydrogen bonds are shown by dashed lines.

**Compound 3:**  $[\{\text{Mn}(\text{acacen})\text{H}_2\text{O}\}_4(\text{Fe}(\text{CN})_5\text{NO})][\text{Fe}(\text{CN})_5\text{NO}] \cdot 4\text{CH}_3\text{CN}$

**Table 3S.** Selected geometric parameters (Å, °) in **3**.

|                        |             |                        |             |
|------------------------|-------------|------------------------|-------------|
| Mn1—O1                 | 1.8970 (10) | C2—C3                  | 1.372 (2)   |
| Mn1—O2                 | 1.9082 (10) | C3—C4                  | 1.423 (2)   |
| Mn1—N2                 | 1.9697 (12) | C4—C5                  | 1.510 (2)   |
| Mn1—N1                 | 1.9710 (13) | C6—C7                  | 1.512 (2)   |
| Mn1—O3                 | 2.2471 (11) | C8—C9                  | 1.512 (2)   |
| Mn1—N13                | 2.3325 (13) | C9—C10                 | 1.431 (2)   |
| Fe1—N4                 | 1.658 (3)   | C10—C11                | 1.371 (2)   |
| Fe1—C13 <sup>i</sup>   | 1.9337 (14) | C11—C12                | 1.502 (2)   |
| Fe1—C13 <sup>ii</sup>  | 1.9337 (14) | Fe2—Fe2 <sup>iv</sup>  | 0.5418 (12) |
| Fe1—C13                | 1.9337 (14) | Fe2—C21                | 1.532 (3)   |
| Fe1—C13 <sup>iii</sup> | 1.9337 (14) | Fe2—C22                | 1.9438 (16) |
| Fe1—C15                | 1.945 (3)   | Fe2—C22 <sup>v</sup>   | 1.9438 (16) |
| N13—C13                | 1.1467 (19) | Fe2—C22 <sup>iv</sup>  | 1.9640 (16) |
| O4—N4                  | 1.146 (4)   | Fe2—C22 <sup>vi</sup>  | 1.9640 (16) |
| N15—C15                | 1.147 (4)   | Fe2—C21 <sup>iv</sup>  | 2.073 (3)   |
| O1—C2                  | 1.2982 (19) | Fe2—N21N <sup>iv</sup> | 2.073 (3)   |
| O2—C11                 | 1.3036 (18) | C21—N21                | 1.154 (4)   |
| N1—C4                  | 1.308 (2)   | C21—Fe2 <sup>iv</sup>  | 2.073 (3)   |
| N1—C6                  | 1.4774 (19) | N22—C22                | 1.147 (2)   |
| N2—C9                  | 1.300 (2)   | C22—Fe2 <sup>iv</sup>  | 1.9640 (16) |
| N2—C7                  | 1.4732 (19) | N1S—C1S                | 1.142 (3)   |
| C1—C2                  | 1.504 (2)   | C1S—C2S                | 1.454 (4)   |
|                        |             |                        |             |
| O1—Mn1—O2              | 90.58 (4)   | O1—C2—C3               | 124.68 (14) |
| O1—Mn1—N2              | 176.26 (5)  | O1—C2—C1               | 114.46 (14) |
| O2—Mn1—N2              | 92.63 (5)   | N1—C4—C5               | 120.17 (14) |
| O1—Mn1—N1              | 92.60 (5)   | C3—C4—C5               | 117.13 (15) |

|                                           |             |                                           |             |
|-------------------------------------------|-------------|-------------------------------------------|-------------|
| O2—Mn1—N1                                 | 175.13 (5)  | N1—C6—C7                                  | 108.94 (12) |
| N2—Mn1—N1                                 | 84.33 (5)   | N2—C7—C6                                  | 108.58 (12) |
| O1—Mn1—O3                                 | 90.39 (4)   | C3—C2—C1                                  | 120.86 (15) |
| O2—Mn1—O3                                 | 91.31 (4)   | C2—C3—C4                                  | 126.03 (15) |
| N2—Mn1—O3                                 | 87.62 (5)   | N1—C4—C3                                  | 122.69 (14) |
| N1—Mn1—O3                                 | 92.36 (5)   | N2—C9—C10                                 | 122.23 (13) |
| O1—Mn1—N13                                | 93.49 (4)   | N2—C9—C8                                  | 121.14 (14) |
| O2—Mn1—N13                                | 87.44 (4)   | C10—C9—C8                                 | 116.62 (14) |
| N2—Mn1—N13                                | 88.57 (5)   | C11—C10—C9                                | 125.74 (15) |
| N1—Mn1—N13                                | 88.68 (5)   | O2—C11—C10                                | 125.25 (14) |
| O3—Mn1—N13                                | 175.93 (5)  | O2—C11—C12                                | 114.16 (13) |
| N4—Fe1—C13 <sup>i</sup>                   | 96.11 (5)   | C10—C11—C12                               | 120.56 (14) |
| N4—Fe1—C13 <sup>ii</sup>                  | 96.11 (5)   | C21—Fe2—C22                               | 95.84 (6)   |
| C13 <sup>i</sup> —Fe1—C13 <sup>ii</sup>   | 89.352 (10) | C21—Fe2—C22 <sup>v</sup>                  | 95.84 (6)   |
| N4—Fe1—C13                                | 96.11 (5)   | C22—Fe2—C22 <sup>v</sup>                  | 168.32 (12) |
| C13 <sup>i</sup> —Fe1—C13                 | 89.352 (10) | C21—Fe2—C22 <sup>iv</sup>                 | 100.09 (6)  |
| C13 <sup>ii</sup> —Fe1—C13                | 167.79 (9)  | C22—Fe2—C22 <sup>iv</sup>                 | 88.979 (7)  |
| N4—Fe1—C13 <sup>iii</sup>                 | 96.11 (5)   | C22 <sup>v</sup> —Fe2—C22 <sup>iv</sup>   | 88.979 (7)  |
| C13 <sup>i</sup> —Fe1—C13 <sup>iii</sup>  | 167.79 (9)  | C21—Fe2—C22 <sup>vi</sup>                 | 100.09 (6)  |
| C13 <sup>ii</sup> —Fe1—C13 <sup>iii</sup> | 89.352 (10) | C22—Fe2—C22 <sup>vi</sup>                 | 88.979 (7)  |
| C13—Fe1—C13 <sup>iii</sup>                | 89.352 (11) | C22 <sup>v</sup> —Fe2—C22 <sup>vi</sup>   | 88.979 (7)  |
| N4—Fe1—C15                                | 180.000 (2) | C22 <sup>iv</sup> —Fe2—C22 <sup>vi</sup>  | 159.83 (12) |
| C13 <sup>i</sup> —Fe1—C15                 | 83.89 (5)   | C21—Fe2—C21 <sup>iv</sup>                 | 180.000 (1) |
| C13 <sup>ii</sup> —Fe1—C15                | 83.89 (5)   | C22—Fe2—C21 <sup>iv</sup>                 | 84.16 (6)   |
| C13—Fe1—C15                               | 83.89 (5)   | C22 <sup>v</sup> —Fe2—C21 <sup>iv</sup>   | 84.16 (6)   |
| C13 <sup>iii</sup> —Fe1—C15               | 83.89 (5)   | C22 <sup>iv</sup> —Fe2—C21 <sup>iv</sup>  | 79.91 (6)   |
| C13—N13—Mn1                               | 142.86 (11) | C22 <sup>vi</sup> —Fe2—C21 <sup>iv</sup>  | 79.91 (6)   |
| N13—C13—Fe1                               | 175.96 (14) | C21—Fe2—N21N <sup>iv</sup>                | 180.000 (1) |
| O4—N4—Fe1                                 | 180.000 (2) | C22—Fe2—N21N <sup>iv</sup>                | 84.16 (6)   |
| N15—C15—Fe1                               | 180.000 (1) | C22 <sup>v</sup> —Fe2—N21N <sup>iv</sup>  | 84.16 (6)   |
| C2—O1—Mn1                                 | 127.76 (10) | C22 <sup>iv</sup> —Fe2—N21N <sup>iv</sup> | 79.91 (6)   |
| C11—O2—Mn1                                | 125.95 (9)  | C22 <sup>vi</sup> —Fe2—N21N <sup>iv</sup> | 79.91 (6)   |
| C4—N1—C6                                  | 120.78 (13) | N21—C21—Fe2                               | 180.000 (1) |
| C4—N1—Mn1                                 | 125.91 (10) | N21—C21—Fe2 <sup>iv</sup>                 | 180.000 (1) |
| C6—N1—Mn1                                 | 112.57 (10) | N22—C22—Fe2                               | 167.85 (18) |
| C9—N2—C7                                  | 122.08 (12) | N22—C22—Fe2 <sup>iv</sup>                 | 176.18 (18) |
| C9—N2—Mn1                                 | 126.38 (10) | Fe2—C22—Fe2 <sup>iv</sup>                 | 15.93 (4)   |
| C7—N2—Mn1                                 | 111.25 (10) | N1S—C1S—C2S                               | 178.6 (3)   |

Symmetry code(s): (i)  $y, -x+3/2, z$ ; (ii)  $-x+3/2, -y+3/2, z$ ; (iii)  $-y+3/2, x, z$ ; (iv)  $y+1/2, -x+1, -z+2$ ; (v)  $-x+3/2, -y+1/2, z$ ; (vi)  $-y+1, x-1/2, -z+2$ .

### Hydrogen bonds ( $\text{\AA}, ^\circ$ ) in **3**.

| Hydrogen bond      | D-H     | H...A   | D...A      | $\angle(\text{DHA})$ | Symmetry operations |
|--------------------|---------|---------|------------|----------------------|---------------------|
| O(3)—H(32)...O(2)  | 0.79(2) | 2.01(2) | 2.7894(14) | 171(2)               | $-x+2, -y+1, -z+2$  |
| O(3)—H(31)...N(22) | 0.84(3) | 2.04(2) | 2.8510(19) | 162(2)               | $x, y, z$           |

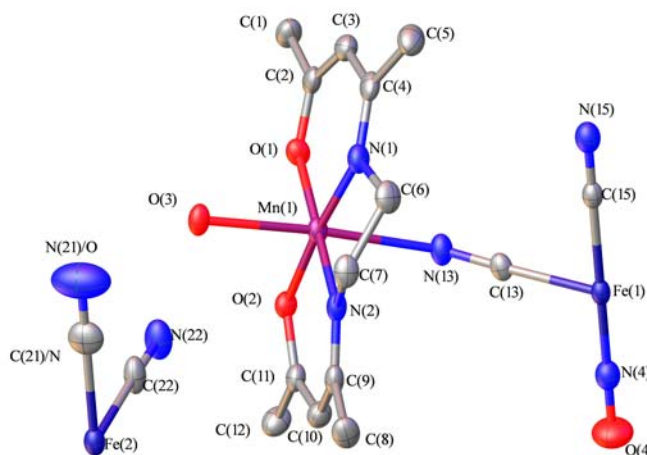

Fig. 3aS ORTEP plot (ellipsoids of 50% probability) with numerating scheme in **3**.

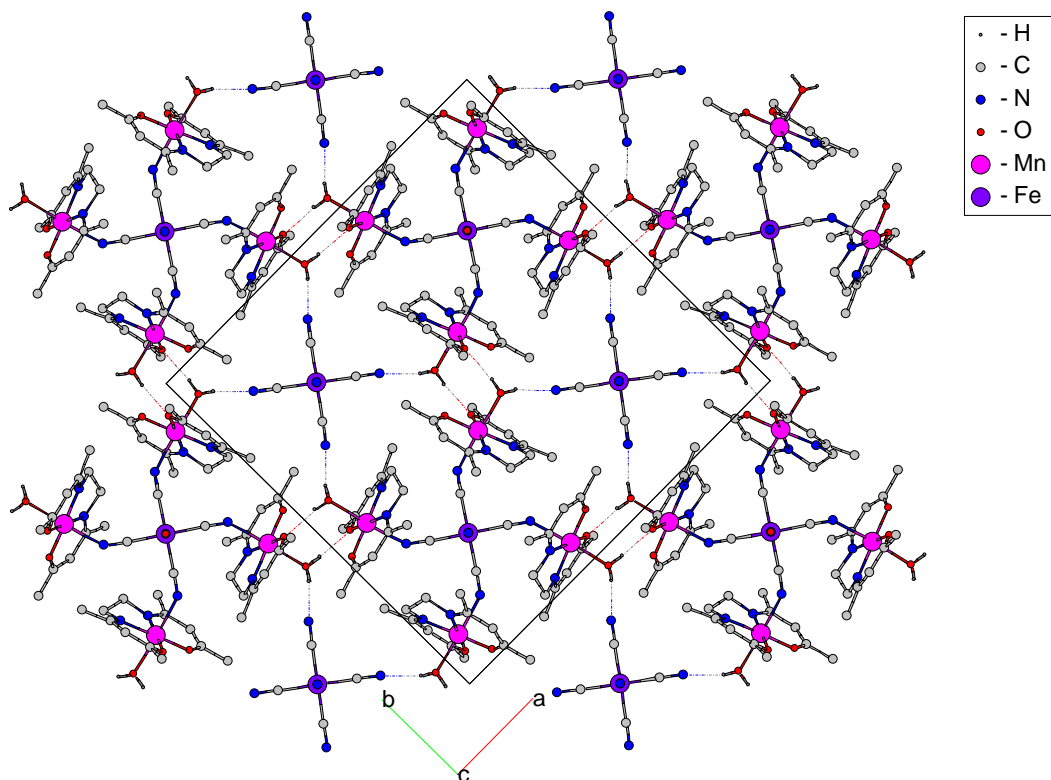

Fig. 3bS The layer based on hydrogen bonding between cations and anions in 3

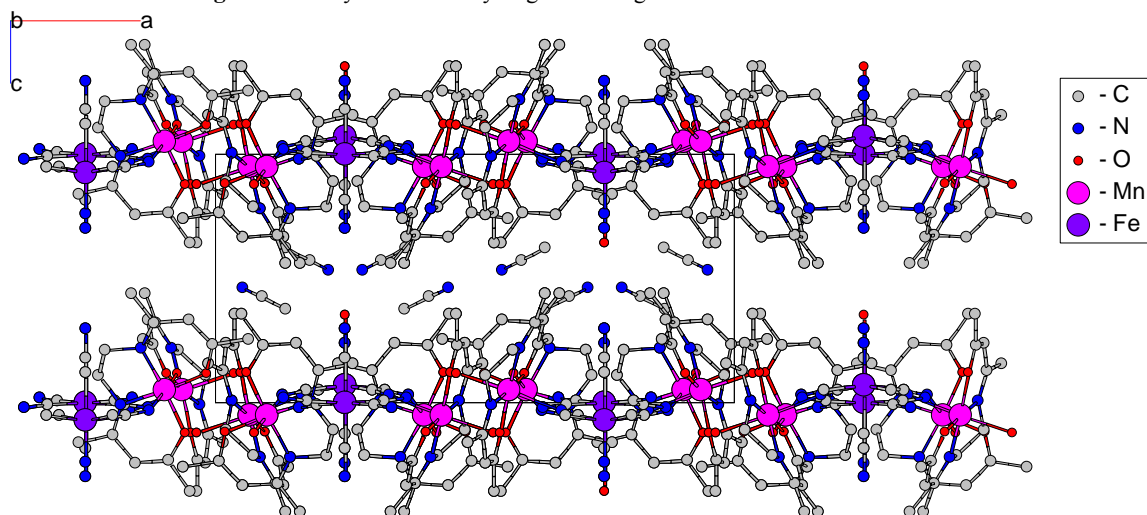

Fig. 3cS Superposition of the layers in 3. Hydrogen atoms for acacen ligands are omitted for clarity.

**Compound 4:**  $[\{\text{Mn}(\text{acacen})\}_2(\text{C}_3\text{H}_7\text{OH})\{\text{Fe}(\text{CN})_5\text{NO}\}]_n$

Table 4S. Selected geometric parameters (Å, °) in 4.

|         |             |                      |            |
|---------|-------------|----------------------|------------|
| Mn1—O3  | 2.263 (2)   | Fe1—C21              | 1.947 (4)  |
| Mn1—N1  | 1.979 (2)   | Fe1—C21 <sup>1</sup> | 1.917 (4)  |
| Mn1—N2  | 1.972 (2)   | Fe1—C31              | 1.971 (10) |
| Mn1—O1  | 1.915 (2)   | Fe1—C31 <sup>1</sup> | 1.534 (9)  |
| Mn1—O2  | 1.9004 (19) | Fe1—N51              | 1.632 (8)  |
| Mn1—N21 | 2.267 (2)   | Fe1—N51 <sup>1</sup> | 2.078 (8)  |
| N1—C4   | 1.305 (4)   | Fe1—C41              | 1.914 (4)  |
| N1—C6   | 1.475 (3)   | Fe1—C41 <sup>1</sup> | 1.969 (4)  |
| N2—C7   | 1.471 (4)   | N21—C21              | 1.147 (4)  |
| N2—C9   | 1.311 (4)   | C21—Fe1 <sup>1</sup> | 1.917 (4)  |
| C1—C2   | 1.504 (4)   | C31—Fe1 <sup>1</sup> | 1.534 (9)  |
| C2—C3   | 1.366 (4)   | C31—N31              | 1.176 (12) |
| C2—O1   | 1.313 (3)   | C31—O51 <sup>1</sup> | 1.271 (11) |
| C3—C4   | 1.429 (4)   | N31—N51 <sup>1</sup> | 1.122 (11) |
| C4—C5   | 1.505 (4)   | N51—Fe1 <sup>1</sup> | 2.078 (8)  |
| C6—C7   | 1.518 (4)   | N51—N31 <sup>1</sup> | 1.122 (11) |
| C8—C9   | 1.510 (4)   | N51—O51              | 1.129 (9)  |

|                                        |             |                                        |            |
|----------------------------------------|-------------|----------------------------------------|------------|
| C9—C10                                 | 1.421 (4)   | O51—C31 <sup>i</sup>                   | 1.271 (11) |
| C10—C11                                | 1.376 (4)   | C41—Fe1 <sup>i</sup>                   | 1.969 (4)  |
| C11—C12                                | 1.501 (4)   | C41—N41                                | 1.146 (4)  |
| C11—O2                                 | 1.301 (4)   | O1S—C1S                                | 1.318 (7)  |
| Fe1—Fe1 <sup>i</sup>                   | 0.448 (2)   | C1S—C1S <sup>ii</sup>                  | 1.489 (10) |
| O3—Mn1—N21                             | 178.19 (8)  | Fe1 <sup>i</sup> —Fe1—N51              | 172.5 (10) |
| N1—Mn1—O3                              | 91.06 (9)   | Fe1 <sup>i</sup> —Fe1—C41 <sup>i</sup> | 76.4 (8)   |
| N1—Mn1—N21                             | 87.85 (9)   | Fe1 <sup>i</sup> —Fe1—C41              | 90.5 (8)   |
| N2—Mn1—O3                              | 87.35 (9)   | C21 <sup>i</sup> —Fe1—C21              | 166.70 (7) |
| N2—Mn1—N1                              | 83.75 (10)  | C21 <sup>i</sup> —Fe1—C31              | 82.8 (3)   |
| N2—Mn1—N21                             | 91.10 (9)   | C21—Fe1—C31                            | 84.1 (3)   |
| O1—Mn1—O3                              | 92.03 (8)   | C21—Fe1—N51 <sup>i</sup>               | 84.0 (2)   |
| O1—Mn1—N1                              | 92.19 (9)   | C21 <sup>i</sup> —Fe1—N51 <sup>i</sup> | 82.7 (3)   |
| O1—Mn1—N2                              | 175.88 (9)  | C21 <sup>i</sup> —Fe1—C41 <sup>i</sup> | 88.38 (17) |
| O1—Mn1—N21                             | 89.46 (8)   | C21—Fe1—C41 <sup>i</sup>               | 88.49 (17) |
| O2—Mn1—O3                              | 88.21 (8)   | C31 <sup>i</sup> —Fe1—C21 <sup>i</sup> | 98.4 (4)   |
| O2—Mn1—N1                              | 176.05 (9)  | C31 <sup>i</sup> —Fe1—C21              | 94.6 (4)   |
| O2—Mn1—N2                              | 92.33 (9)   | C31 <sup>i</sup> —Fe1—C31              | 176.7 (2)  |
| O2—Mn1—O1                              | 91.72 (8)   | C31 <sup>i</sup> —Fe1—N51 <sup>i</sup> | 170.4 (5)  |
| O2—Mn1—N21                             | 92.77 (9)   | C31 <sup>i</sup> —Fe1—C41 <sup>i</sup> | 90.3 (4)   |
| C4—N1—Mn1                              | 125.77 (19) | C31 <sup>i</sup> —Fe1—C41              | 102.8 (4)  |
| C4—N1—C6                               | 122.2 (2)   | N51—Fe1—C21                            | 94.8 (3)   |
| C6—N1—Mn1                              | 112.05 (18) | N51—Fe1—C21 <sup>i</sup>               | 98.5 (3)   |
| C7—N2—Mn1                              | 111.93 (18) | N51—Fe1—C31                            | 174.4 (5)  |
| C9—N2—Mn1                              | 125.5 (2)   | N51—Fe1—N51 <sup>i</sup>               | 178.4 (2)  |
| C9—N2—C7                               | 122.5 (2)   | N51—Fe1—C41                            | 94.3 (3)   |
| C3—C2—C1                               | 121.0 (3)   | N51—Fe1—C41 <sup>i</sup>               | 98.8 (3)   |
| O1—C2—C1                               | 114.4 (2)   | C41—Fe1—C21 <sup>i</sup>               | 91.01 (18) |
| O1—C2—C3                               | 124.6 (3)   | C41—Fe1—C21                            | 89.11 (17) |
| C2—C3—C4                               | 126.6 (3)   | C41—Fe1—C31                            | 80.2 (3)   |
| N1—C4—C3                               | 121.9 (3)   | C41 <sup>i</sup> —Fe1—C31              | 86.7 (3)   |
| N1—C4—C5                               | 121.1 (3)   | C41 <sup>i</sup> —Fe1—N51 <sup>i</sup> | 80.1 (2)   |
| C3—C4—C5                               | 117.0 (3)   | C41—Fe1—N51 <sup>i</sup>               | 86.7 (2)   |
| N1—C6—C7                               | 107.4 (2)   | C41—Fe1—C41 <sup>i</sup>               | 166.84 (7) |
| N2—C7—C6                               | 108.1 (2)   | C21—N21—Mn1                            | 155.5 (2)  |
| N2—C9—C8                               | 120.7 (3)   | Fe1 <sup>i</sup> —C21—Fe1              | 13.30 (7)  |
| N2—C9—C10                              | 122.5 (3)   | N21—C21—Fe1                            | 172.3 (3)  |
| C10—C9—C8                              | 116.8 (3)   | N21—C21—Fe1 <sup>i</sup>               | 174.4 (3)  |
| C11—C10—C9                             | 125.8 (3)   | Fe1 <sup>i</sup> —C31—Fe1              | 3.3 (2)    |
| C10—C11—C12                            | 121.2 (3)   | N31—C31—Fe1 <sup>i</sup>               | 179.2 (9)  |
| O2—C11—C10                             | 124.9 (3)   | N31—C31—Fe1                            | 177.0 (7)  |
| O2—C11—C12                             | 113.9 (3)   | N31 <sup>i</sup> —N51—Fe1              | 159.1 (7)  |
| C2—O1—Mn1                              | 125.10 (17) | N31 <sup>i</sup> —N51—Fe1 <sup>i</sup> | 158.1 (7)  |
| C11—O2—Mn1                             | 126.10 (19) | O51—N51—Fe1 <sup>i</sup>               | 178.0 (7)  |
| Fe1 <sup>i</sup> —Fe1—C21              | 79.5 (8)    | O51—N51—Fe1                            | 178.0 (7)  |
| Fe1 <sup>i</sup> —Fe1—C21 <sup>i</sup> | 87.2 (8)    | N41—C41—Fe1 <sup>i</sup>               | 173.3 (3)  |
| Fe1 <sup>i</sup> —Fe1—C31              | 11.2 (8)    | N41—C41—Fe1                            | 173.5 (3)  |
| Fe1 <sup>i</sup> —Fe1—C31 <sup>i</sup> | 165.5 (10)  | O1S—C1S—C1S <sup>ii</sup>              | 110.8 (4)  |

Symmetry code(s): (i)  $-x+3/2, -y-1/2, -z$ ; (ii)  $-x+1, y, -z+1/2$ .

#### Hydrogen bonds (Å, °) in 4

| Hydrogen bond      | D-H     | H...A   | D...A    | <(DHA) | Symmetry operations |
|--------------------|---------|---------|----------|--------|---------------------|
| O(1s)-H(1)...N(81) | 0.84(4) | 2.10(4) | 2.936(4) | 175(4) | $-x+2, y+1/2, -z+1$ |

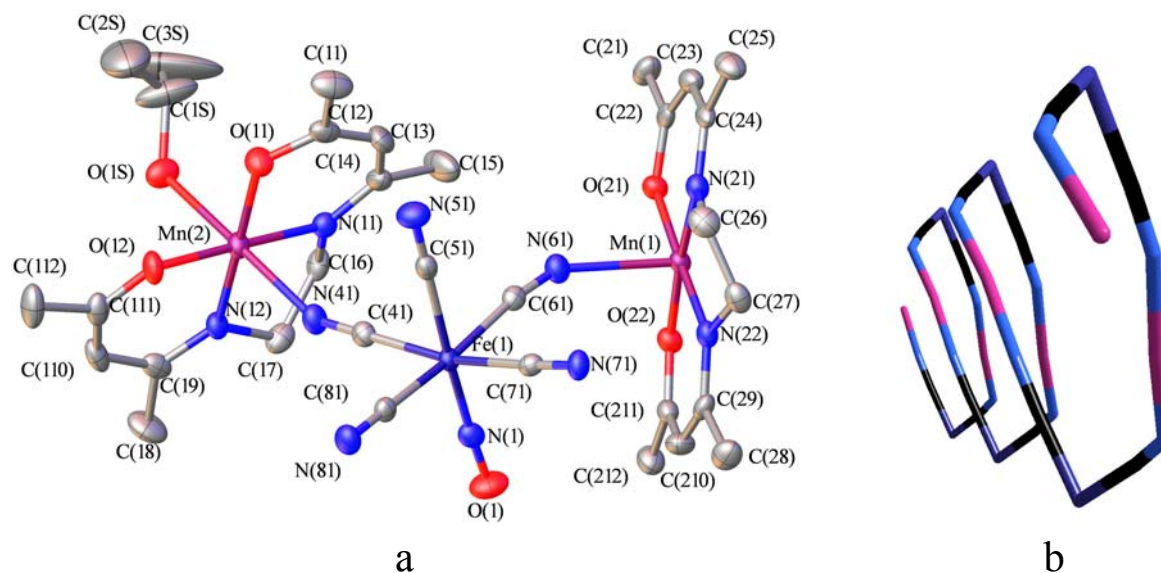

**Fig. 4S.** ORTEP plot (ellipsoids of 50% probability) with numerating scheme (a), simplified backbone of the right-handed helical chain (b, view along 2<sub>1</sub> axis).

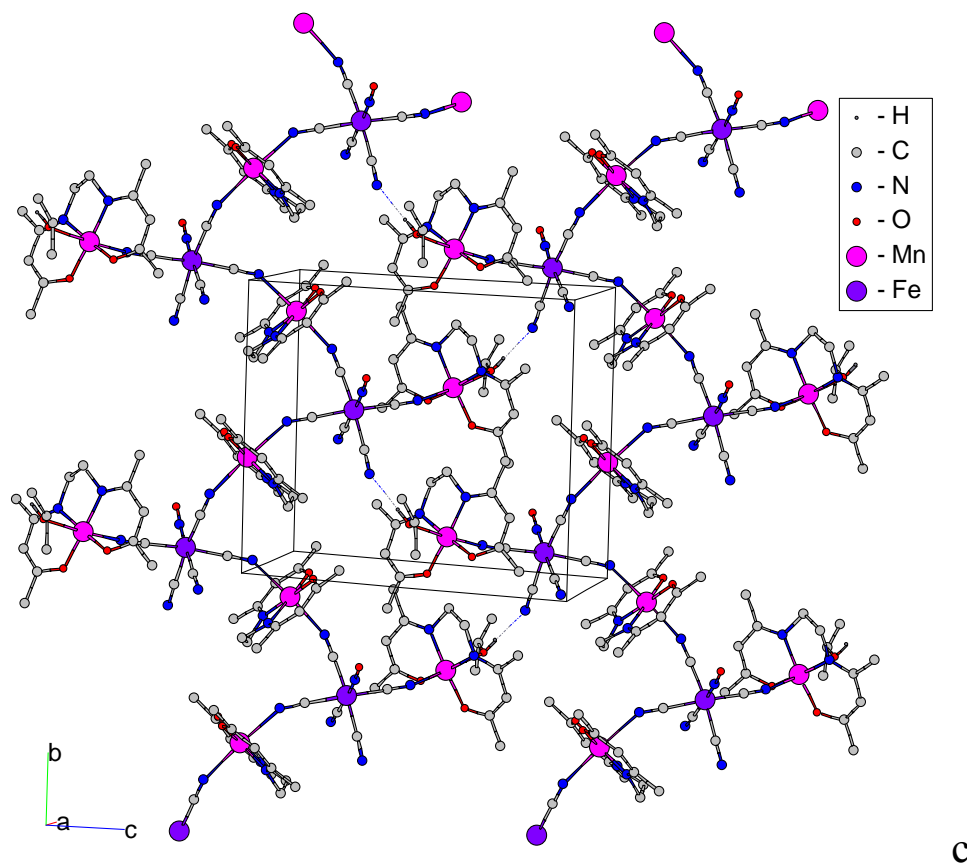

**Fig. 4bS** Packing of the chains (c) in  $[\text{Mn}(\text{acacen})]_2(\text{i-PrOH})\{\text{Fe}(\text{CN})_5\text{NO}\}_n$  (4). Hydrogen atoms of SB ligands are omitted for clarity. Hydrogen bonds are shown by dashed lines.

**Compound 5:**  $[\text{Mn}(\text{acacen})]_2\text{Fe}(\text{CN})_5\text{NO}]_n$

**Table 5S.** Selected geometric parameters (Å, °) in 5.

|         |           |           |           |
|---------|-----------|-----------|-----------|
| Fe1—N16 | 1.644 (3) | C106—C107 | 1.497 (5) |
| Fe1—C15 | 1.923 (4) | C107—N102 | 1.472 (4) |
| Fe1—C11 | 1.942 (3) | N102—C109 | 1.313 (4) |
| Fe1—C12 | 1.953 (3) | C108—C109 | 1.503 (5) |
| Fe1—C14 | 1.966 (3) | C109—C110 | 1.402 (5) |
| Fe1—C13 | 1.966 (3) | C110—C111 | 1.362 (5) |
| C11—N11 | 1.150 (4) | C111—O102 | 1.297 (4) |
| N11—Mn1 | 2.375 (3) | C111—C112 | 1.495 (5) |
| C12—N12 | 1.143 (4) | Mn2—O202  | 1.896 (2) |
| N12—Mn2 | 2.441 (3) | Mn2—O201  | 1.892 (2) |
| C13—N13 | 1.132 (4) | Mn2—N202  | 1.959 (3) |



|                             |             |                            |             |
|-----------------------------|-------------|----------------------------|-------------|
| N13—Mn2 <sup>i</sup>        | 2.437 (3)   | Mn2—N201                   | 1.978 (3)   |
| C14—N14                     | 1.145 (4)   | Mn2—N13 <sup>iv</sup>      | 2.437 (3)   |
| N14—Mn1 <sup>ii</sup>       | 2.450 (3)   | O201—C202                  | 1.301 (4)   |
| C15—N15                     | 1.150 (5)   | C201—C202                  | 1.510 (6)   |
| N16—O16                     | 1.132 (4)   | C202—C203                  | 1.352 (6)   |
| Mn1—O102                    | 1.895 (2)   | C203—C204                  | 1.398 (6)   |
| Mn1—O101                    | 1.901 (2)   | C204—N201                  | 1.297 (4)   |
| Mn1—N102                    | 1.969 (3)   | C204—C205                  | 1.531 (5)   |
| Mn1—N101                    | 1.972 (3)   | N201—C206                  | 1.462 (5)   |
| Mn1—N14 <sup>iii</sup>      | 2.450 (3)   | C206—C207                  | 1.449 (6)   |
| O101—C102                   | 1.301 (4)   | C207—N202                  | 1.454 (5)   |
| C101—C102                   | 1.499 (5)   | N202—C209                  | 1.318 (4)   |
| C102—C103                   | 1.363 (5)   | C208—C209                  | 1.509 (5)   |
| C103—C104                   | 1.408 (5)   | C209—C210                  | 1.401 (5)   |
| C104—N101                   | 1.310 (4)   | C210—C211                  | 1.350 (5)   |
| C104—C105                   | 1.517 (5)   | C211—O202                  | 1.300 (4)   |
| N101—C106                   | 1.464 (4)   | C211—C212                  | 1.502 (5)   |
| N16—Fe1—C15                 | 175.29 (15) | N102—C107—C106             | 107.2 (3)   |
| N16—Fe1—C11                 | 92.93 (14)  | C109—N102—C107             | 122.7 (3)   |
| C15—Fe1—C11                 | 82.49 (14)  | C109—N102—Mn1              | 125.4 (2)   |
| N16—Fe1—C12                 | 93.19 (15)  | C107—N102—Mn1              | 111.9 (2)   |
| C15—Fe1—C12                 | 85.73 (15)  | N102—C109—C110             | 121.8 (3)   |
| C11—Fe1—C12                 | 90.15 (12)  | N102—C109—C108             | 120.3 (3)   |
| N16—Fe1—C14                 | 97.07 (14)  | C110—C109—C108             | 117.9 (3)   |
| C15—Fe1—C14                 | 87.52 (14)  | C111—C110—C109             | 126.6 (3)   |
| C11—Fe1—C14                 | 169.95 (15) | O102—C111—C110             | 124.3 (3)   |
| C12—Fe1—C14                 | 90.20 (12)  | O102—C111—C112             | 114.0 (3)   |
| N16—Fe1—C13                 | 92.45 (15)  | C110—C111—C112             | 121.7 (3)   |
| C15—Fe1—C13                 | 88.56 (15)  | C111—O102—Mn1              | 125.4 (2)   |
| C11—Fe1—C13                 | 88.57 (13)  | O202—Mn2—O201              | 93.27 (10)  |
| C12—Fe1—C13                 | 174.27 (15) | O202—Mn2—N202              | 91.58 (11)  |
| C14—Fe1—C13                 | 90.09 (12)  | O201—Mn2—N202              | 174.86 (12) |
| N11—C11—Fe1                 | 178.0 (3)   | O202—Mn2—N201              | 174.55 (11) |
| C11—N11—Mn1                 | 161.3 (3)   | O201—Mn2—N201              | 92.15 (11)  |
| N12—C12—Fe1                 | 177.5 (3)   | N202—Mn2—N201              | 83.01 (12)  |
| C12—N12—Mn2                 | 158.9 (3)   | O202—Mn2—N13 <sup>iv</sup> | 92.30 (10)  |
| N13—C13—Fe1                 | 173.9 (3)   | O201—Mn2—N13 <sup>iv</sup> | 84.37 (10)  |
| C13—N13—Mn2 <sup>i</sup>    | 156.2 (3)   | N202—Mn2—N13 <sup>iv</sup> | 97.11 (11)  |
| N14—C14—Fe1                 | 177.9 (3)   | N201—Mn2—N13 <sup>iv</sup> | 87.75 (11)  |
| C14—N14—Mn1 <sup>ii</sup>   | 160.6 (3)   | O202—Mn2—N12               | 84.40 (9)   |
| N15—C15—Fe1                 | 175.8 (3)   | O201—Mn2—N12               | 92.23 (10)  |
| O16—N16—Fe1                 | 176.0 (3)   | N202—Mn2—N12               | 86.58 (11)  |
| O102—Mn1—O101               | 93.27 (10)  | N201—Mn2—N12               | 95.88 (11)  |
| O102—Mn1—N102               | 91.56 (10)  | N13 <sup>iv</sup> —Mn2—N12 | 175.13 (11) |
| O101—Mn1—N102               | 175.17 (10) | C202—O201—Mn2              | 123.6 (2)   |
| O102—Mn1—N101               | 174.44 (11) | O201—C202—C203             | 126.0 (3)   |
| O101—Mn1—N101               | 91.77 (11)  | O201—C202—C201             | 112.5 (4)   |
| N102—Mn1—N101               | 83.41 (11)  | C203—C202—C201             | 121.5 (4)   |
| O102—Mn1—N11                | 91.76 (9)   | C202—C203—C204             | 125.9 (3)   |
| O101—Mn1—N11                | 86.46 (10)  | N201—C204—C203             | 122.5 (3)   |
| N102—Mn1—N11                | 93.48 (11)  | N201—C204—C205             | 120.3 (4)   |
| N101—Mn1—N11                | 86.20 (10)  | C203—C204—C205             | 117.1 (3)   |
| O102—Mn1—N14 <sup>iii</sup> | 83.49 (9)   | C204—N201—C206             | 123.8 (3)   |
| O101—Mn1—N14 <sup>iii</sup> | 90.25 (10)  | C204—N201—Mn2              | 125.0 (3)   |
| N102—Mn1—N14 <sup>iii</sup> | 90.22 (11)  | C206—N201—Mn2              | 111.1 (2)   |
| N101—Mn1—N14 <sup>iii</sup> | 98.85 (10)  | C207—C206—N201             | 108.9 (3)   |
| N11—Mn1—N14 <sup>iii</sup>  | 174.06 (10) | N202—C207—C206             | 108.7 (3)   |
| C102—O101—Mn1               | 125.7 (2)   | C209—N202—C207             | 123.6 (3)   |
| O101—C102—C103              | 124.4 (3)   | C209—N202—Mn2              | 124.2 (2)   |
| O101—C102—C101              | 114.3 (3)   | C207—N202—Mn2              | 111.6 (2)   |
| C103—C102—C101              | 121.3 (3)   | N202—C209—C210             | 122.1 (3)   |
| C102—C103—C104              | 126.6 (3)   | N202—C209—C208             | 121.0 (4)   |
| N101—C104—C103              | 122.3 (3)   | C210—C209—C208             | 116.9 (3)   |
| N101—C104—C105              | 121.4 (4)   | C211—C210—C209             | 126.3 (3)   |

|                |           |                |           |
|----------------|-----------|----------------|-----------|
| C103—C104—C105 | 116.3 (3) | O202—C211—C210 | 125.1 (3) |
| C104—N101—C106 | 122.8 (3) | O202—C211—C212 | 114.1 (3) |
| C104—N101—Mn1  | 125.2 (3) | C210—C211—C212 | 120.8 (3) |
| C106—N101—Mn1  | 111.8 (2) | C211—O202—Mn2  | 124.5 (2) |
| N101—C106—C107 | 108.4 (3) |                |           |

Symmetry code(s): (i)  $x, y+1, z$ ; (ii)  $x+1, y, z$ ; (iii)  $x-1, y, z$ ; (iv)  $x, y-1, z$ .

No hydrogen bonds found in **5**.

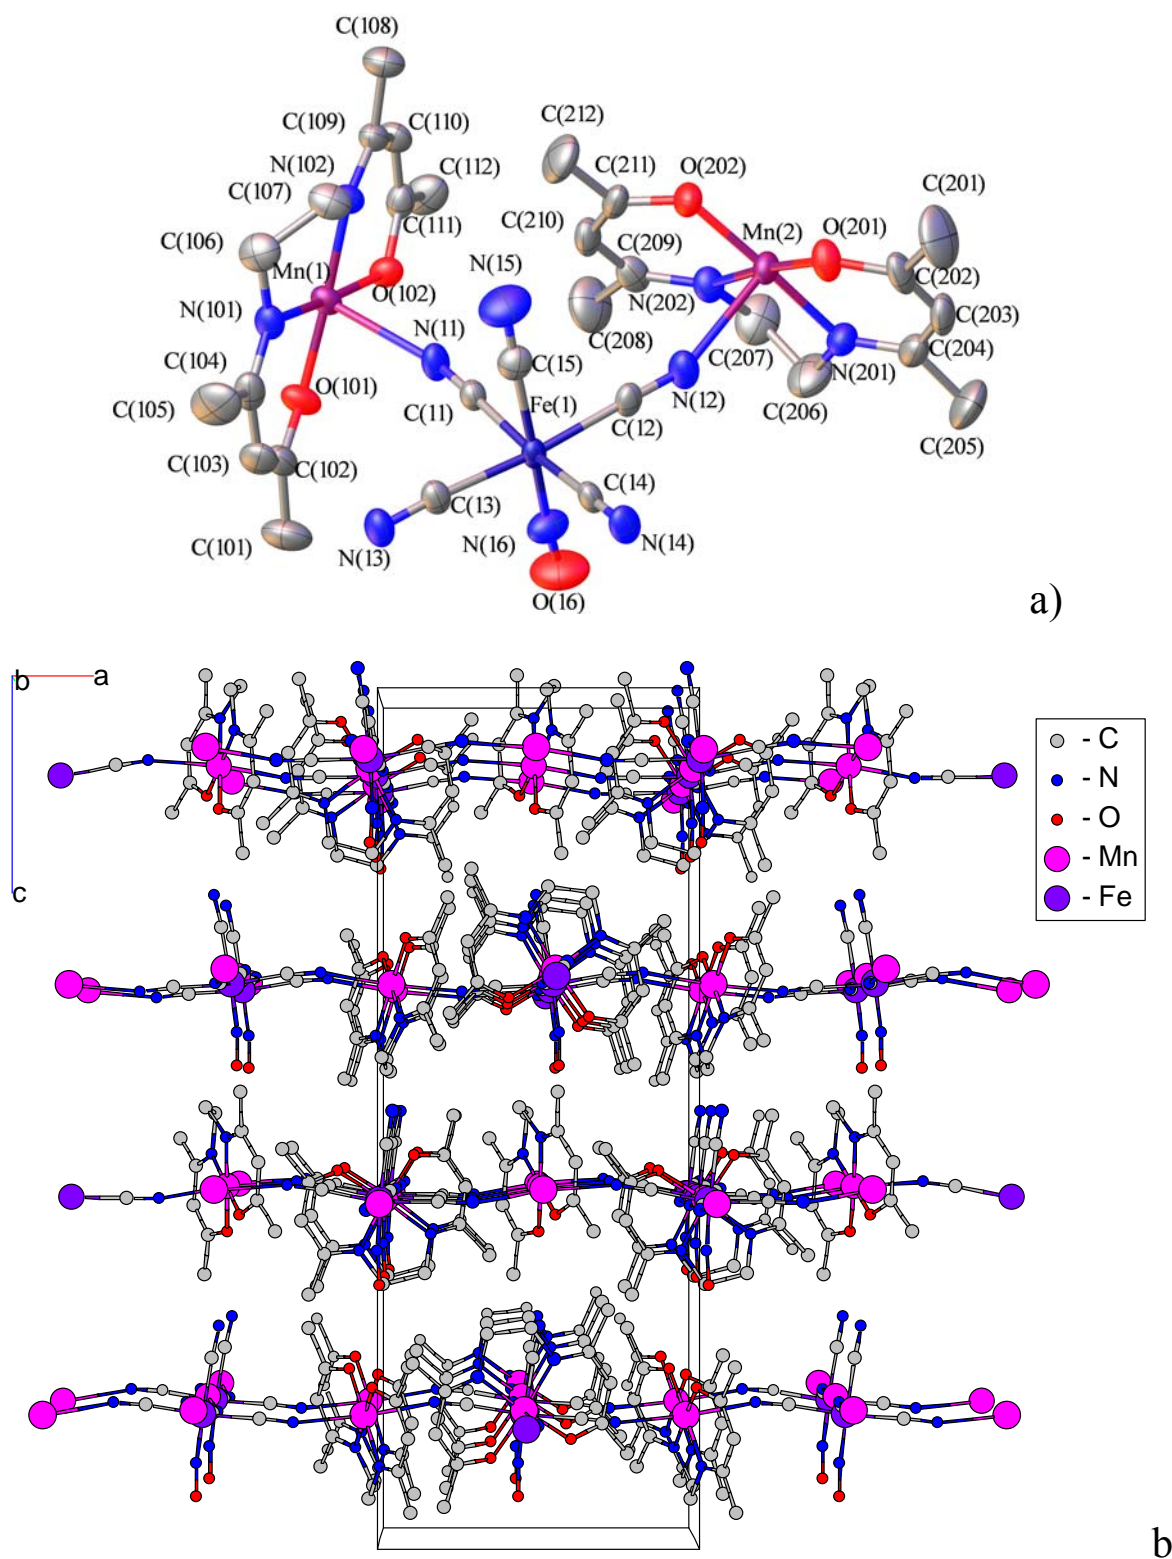

**Fig. 5S** ORTEP plot (ellipsoids of 50% probability) with numerating scheme (a) and four layered packing as a result of  $4_3$  screw axis (b) in crystal structure of  $[\{\text{Mn}(\text{acacen})_2\text{Fe}(\text{CN})_5\text{NO}\}]_n$  (**5**).

### IR spectra, DSC and magnetic measurements

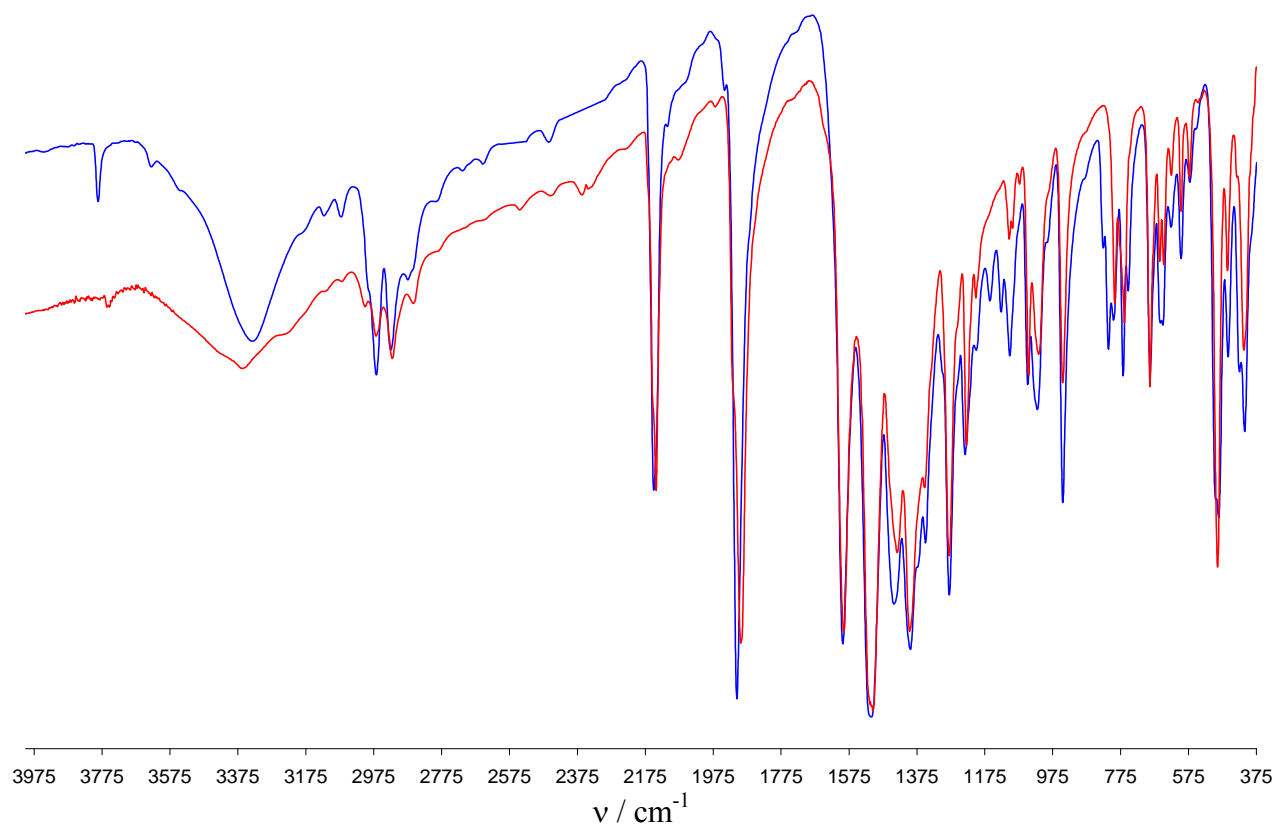

**Fig. 6S** IR (KBr): bleu -  $[\{\text{Mn}(\text{acacen})\}_2(\text{i-PrOH})\{\text{Fe}(\text{CN})_5\text{NO}\}]_n$ , **4**; red -  $[\text{Mn}(\text{acacen})(\text{MeOH})_2\{\text{Fe}(\text{CN})_5\text{NO}\}] \cdot 1.5\text{MeOH}$ , **5**

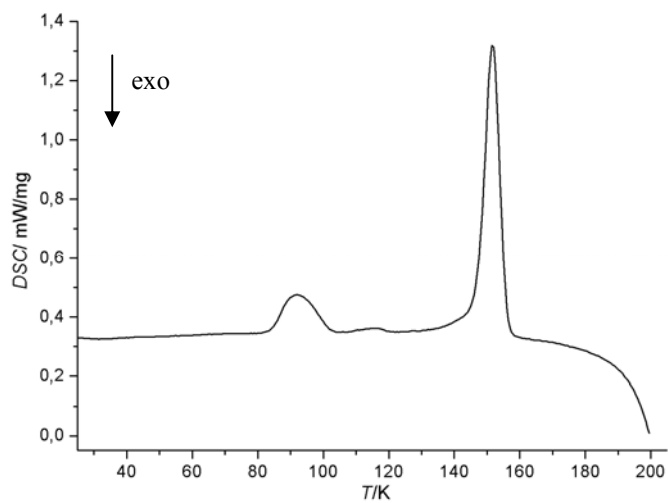

**Fig. 7S** DSC for  $[\{\text{Mn}(\text{acacen})\}_2(\text{i-PrOH})\{\text{Fe}(\text{CN})_5\text{NO}\}]_n$  (**4**).

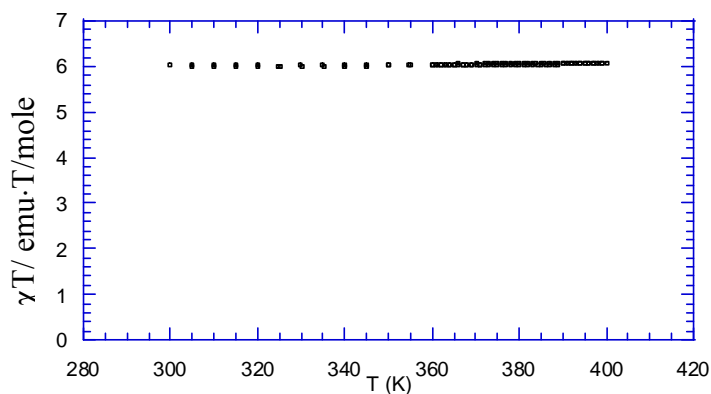

**Fig. 8S** Magnetic measurements at high temperature for  $[\{\text{Mn}(\text{acacen})\}_2(\text{i-PrOH})\{\text{Fe}(\text{CN})_5\text{NO}\}]_n$  (**4**).  
Magnetic susceptibility data were collected on going up 305 K up to 400 and than on going down 400 up to 300 K.
